# Supplementary material for: Natural Infection with Giardia Is Associated with Altered Community Structure of the Human and Canine Gut Microbiome
Source: PubMed Central journal article supplement (PMC7407069; doi:10.1128/msphere.00670-20), 2020-08-05
Supplement: mSphere.00670-20-st001.pdf [file mSphere.00670-20-st001.pdf]

**Taxa enriched in Giardia-infected compared to NPS Controls**

| <b>Taxa</b>          | <b>Correlation Coefficient</b> | <b>Adj. P-value</b> |
|----------------------|--------------------------------|---------------------|
| <i>Clostridium</i>   | 0.29                           | 0.014               |
| <i>Lactobacillus</i> | 0.23                           | 0.014               |

**Taxa enriched in NPS Controls compared to Giardia-infected**

| <b>Taxa</b>        | <b>Correlation Coefficient</b> | <b>Adj. P-value</b> |
|--------------------|--------------------------------|---------------------|
| <i>Bacteroides</i> | 0.31                           | 0.013               |
| <i>Megamonas</i>   | 0.28                           | 0.018               |
